# Supplementary material for: IgG Subclass Switch in Volunteers Repeatedly Immunized with the Full-Length Plasmodium falciparum Merozoite Surface Protein 1 (MSP1)
Source: Vaccines (Basel). 2024 Feb 17;12(2):208. doi: 10.3390/vaccines12020208 (PMC10893298; doi:10.3390/vaccines12020208)
Supplement: Supplementary file 1 [file vaccines-12-00208-s001.zip]

Archive with 7 entries (7 files):
- Rathay et al. Supp. Data S1.xlsx
- Rathay et al. Supp. Data S2.xlsx
- Rathay et al. Supp. Data S3.xlsx
- Rathay et al. Supp. Data S4.xlsx
- Rathay et al. Supp. Data S5 .xlsx
- Rathay et al. Supp. Data S6.xlsx
- vaccines-2862941-supplementary.pdf
