# Supplementary material for: IgG Subclass Switch in Volunteers Repeatedly Immunized with the Full-Length Plasmodium falciparum Merozoite Surface Protein 1 (MSP1)
Source: Vaccines (Basel). 2024 Feb 17;12(2):208. doi: 10.3390/vaccines12020208 (PMC10893298; doi:10.3390/vaccines12020208)
Supplement: Supplementary file 1 [file vaccines-12-00208-s001.zip › Rathay et al. Supp. Data S1.xlsx]

## Sheet: IgG subclasses titres
IgG1 titres
							Vaccinees
Timepoint	28	12	21	29	3	6	9	13	14	15	22	30	32
0	10.2	23	7.5	17.9	0.1	0.1	0.1	0.1	0.1	0.1	0.1	0.1	0.1
85	2970.7	10010	9959	24646.3	5336.3	4191.9	5377.3	1599.8	3773.6	1560.2	1081	2015.8	3242.9
182	1425.7	7747.3	2330.3	5039.4	1994.9	1419	2435.9	595.3	435.9	171.5	282.2	275	297
210	3061	18867.3	3727.7	9901.5	3229.4	2580.9	5110.8	1299.7	2673.7	1104	913.8	1196	3015.9
365	405.4	3056.8	1664.9	2262	359.18	356.605	436.275	169.058	635.55	436.2	176.7	273.6	186
Kenya	1554.5
IgG2 titres
							Vaccinees
Timepoint	28	12	21	29	3	6	9	13	14	15	22	30	32
0	0.1	0.1	0.1	0.1	0.1	0.1	0.1	0.1	0.1	0.1	0.1	0.1	0.1
85	78.2	382.9	90.7	128.7	116.5	186.2	58.3	57.5	85.2	27.744	20.2	29.4	97.3
182	28.5	244.8	60.4	62.6	64.1	93.4	57.9	24	74.9	27.7	17	26.1	35.8
210	100.7	440.2	72.2	180.2	135.8	172.3	99.9	34	170.1	59.1	34.6	54.1	27.3
365	38.4	220.4	32	68.2	33	62.8	11.8	50.8	40.8	28.7	8.4	14.2	29.5
Kenya	27.2
IgG3
							Vaccinees
Timepoint	28	12	21	29	3	6	9	13	14	15	22	30	32
0	40.7	0.1	0.1	0.1	17	0.1	0.1	0.1	0.1	0.1	0.1	0.1	0.1
85	662.5	3521.4	889.3	1591.6	909.2	1259.3	1862.3	857.4	1247.3	650.7	804.1	8535	3711.8
182	125.3	855.7	102.3	278.9	210.7	210.7	413	218.9	268.8	114.2	203.3	1249.4	467.2
210	413.5	3401.1	321.6	488.2	342.9	342.9	833.7	481.2	588.7	217.4	402.9	2643.2	1044.1
365	119.4	470.8	98.7	145.8	5.8	28.9	36.5	43.8	64.5	60.1	38	410.7	64.8
Kenya	6493.8
IgG4 titres
							Vaccinees
Timepoint	28	12	21	29	3	6	9	13	14	15	22	30	32
0	0.1	0.1	0.1	0.1	33	0.1	0.1	0.1	0.1	0.1	0.1	0.1	0.1
85	43.9	7.8	32.4	163.2	67.3	17.7	48.9	8.7	74	20.7	5.2	26.3	42.8
182	159.7	126.7	13.1	822.3	123.9	67	1101.7	43.8	1346.2	1185.4	31.8	211	528
210	1429.4	457.1	54.8	4319.5	333.1	127.9	3221.2	119.2	3318.7	2937.2	83.8	595.7	1365.7
365	316.1	241.9	48.2	1362.5	79.9	45.1	300.5	26.6	1028.8	1424.4	30	170.5	179.4
Kenya	346

## Sheet: IgG subclasses statistics
IgG1			Number of families	1
Friedman test			Number of comparisons per family	21
P value	<0,0001		Alpha	0.05
Exact or approximate P value?	Approximate
P value summary	****		Dunn's multiple comparisons test	Rank sum diff,	Significant?	Summary	Adjusted P Value
Are means signif. different? (P < 0.05)	Yes		0 vs. 29	-14	No	ns	>0,9999
Number of groups	7		0 vs. 57	-67	Yes	****	<0,0001
Friedman statistic	63.33		0 vs. 85	-53	Yes	****	<0,0001
			0 vs. 182	-44	Yes	**	0.0014
Data summary			0 vs. 210	-62	Yes	****	<0,0001
Number of treatments (columns)	7		0 vs. 365	-26	No	ns	0.3834
Number of subjects (rows)	13		29 vs. 57	-53	Yes	****	<0,0001
			29 vs. 85	-39	Yes	**	0.0084
			29 vs. 182	-30	No	ns	0.1356
			29 vs. 210	-48	Yes	***	0.0003
			29 vs. 365	-12	No	ns	>0,9999
			57 vs. 85	14	No	ns	>0,9999
			57 vs. 182	23	No	ns	0.7727
			57 vs. 210	5	No	ns	>0,9999
			57 vs. 365	41	Yes	**	0.0041
			85 vs. 182	9	No	ns	>0,9999
			85 vs. 210	-9	No	ns	>0,9999
			85 vs. 365	27	No	ns	0.299
			182 vs. 210	-18	No	ns	>0,9999
			182 vs. 365	18	No	ns	>0,9999
			210 vs. 365	36	Yes	*	0.0227
			Test details	Rank sum 1	Rank sum 2	Rank sum diff,	n1	n2	Z
			0 vs. 29	14	28	-14	13	13	1.271
			0 vs. 57	14	81	-67	13	13	6.083
			0 vs. 85	14	67	-53	13	13	4.812
			0 vs. 182	14	58	-44	13	13	3.995
			0 vs. 210	14	76	-62	13	13	5.629
			0 vs. 365	14	40	-26	13	13	2.36
			29 vs. 57	28	81	-53	13	13	4.812
			29 vs. 85	28	67	-39	13	13	3.541
			29 vs. 182	28	58	-30	13	13	2.724
			29 vs. 210	28	76	-48	13	13	4.358
			29 vs. 365	28	40	-12	13	13	1.089
			57 vs. 85	81	67	14	13	13	1.271
			57 vs. 182	81	58	23	13	13	2.088
			57 vs. 210	81	76	5	13	13	0.4539
			57 vs. 365	81	40	41	13	13	3.722
			85 vs. 182	67	58	9	13	13	0.8171
			85 vs. 210	67	76	-9	13	13	0.8171
			85 vs. 365	67	40	27	13	13	2.451
			182 vs. 210	58	76	-18	13	13	1.634
			182 vs. 365	58	40	18	13	13	1.634
			210 vs. 365	76	40	36	13	13	3.268
IgG2			Number of families	1
Friedman test			Number of comparisons per family	21
P value	<0,0001		Alpha	0.05
Exact or approximate P value?	Approximate
P value summary	****		Dunn's multiple comparisons test	Rank sum diff,	Significant?	Summary	Adjusted P Value
Are means signif. different? (P < 0.05)	Yes		0 vs. 29	-13	No	ns	>0,9999
Number of groups	7		0 vs. 57	-40	Yes	**	0.0059
Friedman statistic	67.52		0 vs. 85	-61	Yes	****	<0,0001
			0 vs. 182	-43	Yes	**	0.002
Data summary			0 vs. 210	-76	Yes	****	<0,0001
Number of treatments (columns)	7		0 vs. 365	-33	No	ns	0.0575
Number of subjects (rows)	13		29 vs. 57	-27	No	ns	0.299
			29 vs. 85	-48	Yes	***	0.0003
			29 vs. 182	-30	No	ns	0.1356
			29 vs. 210	-63	Yes	****	<0,0001
			29 vs. 365	-20	No	ns	>0,9999
			57 vs. 85	-21	No	ns	>0,9999
			57 vs. 182	-3	No	ns	>0,9999
			57 vs. 210	-36	Yes	*	0.0227
			57 vs. 365	7	No	ns	>0,9999
			85 vs. 182	18	No	ns	>0,9999
			85 vs. 210	-15	No	ns	>0,9999
			85 vs. 365	28	No	ns	0.2315
			182 vs. 210	-33	No	ns	0.0575
			182 vs. 365	10	No	ns	>0,9999
			210 vs. 365	43	Yes	**	0.002
			Test details	Rank sum 1	Rank sum 2	Rank sum diff,	n1	n2	Z
			0 vs. 29	14	27	-13	13	13	1.18
			0 vs. 57	14	54	-40	13	13	3.631
			0 vs. 85	14	75	-61	13	13	5.538
			0 vs. 182	14	57	-43	13	13	3.904
			0 vs. 210	14	90	-76	13	13	6.9
			0 vs. 365	14	47	-33	13	13	2.996
			29 vs. 57	27	54	-27	13	13	2.451
			29 vs. 85	27	75	-48	13	13	4.358
			29 vs. 182	27	57	-30	13	13	2.724
			29 vs. 210	27	90	-63	13	13	5.719
			29 vs. 365	27	47	-20	13	13	1.816
			57 vs. 85	54	75	-21	13	13	1.906
			57 vs. 182	54	57	-3	13	13	0.2724
			57 vs. 210	54	90	-36	13	13	3.268
			57 vs. 365	54	47	7	13	13	0.6355
			85 vs. 182	75	57	18	13	13	1.634
			85 vs. 210	75	90	-15	13	13	1.362
			85 vs. 365	75	47	28	13	13	2.542
			182 vs. 210	57	90	-33	13	13	2.996
			182 vs. 365	57	47	10	13	13	0.9078
			210 vs. 365	90	47	43	13	13	3.904
IgG3			Number of families	1
Friedman test			Number of comparisons per family	21
P value	<0,0001		Alpha	0.05
Exact or approximate P value?	Approximate
P value summary	****		Dunn's multiple comparisons test	Rank sum diff,	Significant?	Summary	Adjusted P Value
Are means signif. different? (P < 0.05)	Yes		0 vs. 29	-27	No	ns	0.299
Number of groups	7		0 vs. 57	-74	Yes	****	<0,0001
Friedman statistic	71.01		0 vs. 85	-66	Yes	****	<0,0001
			0 vs. 182	-36	Yes	*	0.0227
Data summary			0 vs. 210	-53	Yes	****	<0,0001
Number of treatments (columns)	7		0 vs. 365	-17	No	ns	>0,9999
Number of subjects (rows)	13		29 vs. 57	-47	Yes	***	0.0004
			29 vs. 85	-39	Yes	**	0.0084
			29 vs. 182	-9	No	ns	>0,9999
			29 vs. 210	-26	No	ns	0.3834
			29 vs. 365	10	No	ns	>0,9999
			57 vs. 85	8	No	ns	>0,9999
			57 vs. 182	38	Yes	*	0.0118
			57 vs. 210	21	No	ns	>0,9999
			57 vs. 365	57	Yes	****	<0,0001
			85 vs. 182	30	No	ns	0.1356
			85 vs. 210	13	No	ns	>0,9999
			85 vs. 365	49	Yes	***	0.0002
			182 vs. 210	-17	No	ns	>0,9999
			182 vs. 365	19	No	ns	>0,9999
			210 vs. 365	36	Yes	*	0.0227
			Test details	Rank sum 1	Rank sum 2	Rank sum diff,	n1	n2	Z
			0 vs. 29	13	40	-27	13	13	2.451
			0 vs. 57	13	87	-74	13	13	6.718
			0 vs. 85	13	79	-66	13	13	5.992
			0 vs. 182	13	49	-36	13	13	3.268
			0 vs. 210	13	66	-53	13	13	4.812
			0 vs. 365	13	30	-17	13	13	1.543
			29 vs. 57	40	87	-47	13	13	4.267
			29 vs. 85	40	79	-39	13	13	3.541
			29 vs. 182	40	49	-9	13	13	0.8171
			29 vs. 210	40	66	-26	13	13	2.36
			29 vs. 365	40	30	10	13	13	0.9078
			57 vs. 85	87	79	8	13	13	0.7263
			57 vs. 182	87	49	38	13	13	3.45
			57 vs. 210	87	66	21	13	13	1.906
			57 vs. 365	87	30	57	13	13	5.175
			85 vs. 182	79	49	30	13	13	2.724
			85 vs. 210	79	66	13	13	13	1.18
			85 vs. 365	79	30	49	13	13	4.448
			182 vs. 210	49	66	-17	13	13	1.543
			182 vs. 365	49	30	19	13	13	1.725
			210 vs. 365	66	30	36	13	13	3.268
IgG4			Number of families	1
Friedman test			Number of comparisons per family	21
P value	<0,0001		Alpha	0.05
Exact or approximate P value?	Approximate
P value summary	****		Dunn's multiple comparisons test	Rank sum diff,	Significant?	Summary	Adjusted P Value
Are means signif. different? (P < 0.05)	Yes		0 vs. 29	-7	No	ns	>0,9999
Number of groups	7		0 vs. 57	-24	No	ns	0.6162
Friedman statistic	75.79		0 vs. 85	-36	Yes	*	0.0227
			0 vs. 182	-48	Yes	***	0.0003
Data summary			0 vs. 210	-74	Yes	****	<0,0001
Number of treatments (columns)	7		0 vs. 365	-63	Yes	****	<0,0001
Number of subjects (rows)	13		29 vs. 57	-17	No	ns	>0,9999
			29 vs. 85	-29	No	ns	0.1779
			29 vs. 182	-41	Yes	**	0.0041
			29 vs. 210	-67	Yes	****	<0,0001
			29 vs. 365	-56	Yes	****	<0,0001
			57 vs. 85	-12	No	ns	>0,9999
			57 vs. 182	-24	No	ns	0.6162
			57 vs. 210	-50	Yes	***	0.0001
			57 vs. 365	-39	Yes	**	0.0084
			85 vs. 182	-12	No	ns	>0,9999
			85 vs. 210	-38	Yes	*	0.0118
			85 vs. 365	-27	No	ns	0.299
			182 vs. 210	-26	No	ns	0.3834
			182 vs. 365	-15	No	ns	>0,9999
			210 vs. 365	11	No	ns	>0,9999
			Test details	Rank sum 1	Rank sum 2	Rank sum diff,	n1	n2	Z
			0 vs. 29	16	23	-7	13	13	0.6355
			0 vs. 57	16	40	-24	13	13	2.179
			0 vs. 85	16	52	-36	13	13	3.268
			0 vs. 182	16	64	-48	13	13	4.358
			0 vs. 210	16	90	-74	13	13	6.718
			0 vs. 365	16	79	-63	13	13	5.719
			29 vs. 57	23	40	-17	13	13	1.543
			29 vs. 85	23	52	-29	13	13	2.633
			29 vs. 182	23	64	-41	13	13	3.722
			29 vs. 210	23	90	-67	13	13	6.083
			29 vs. 365	23	79	-56	13	13	5.084
			57 vs. 85	40	52	-12	13	13	1.089
			57 vs. 182	40	64	-24	13	13	2.179
			57 vs. 210	40	90	-50	13	13	4.539
			57 vs. 365	40	79	-39	13	13	3.541
			85 vs. 182	52	64	-12	13	13	1.089
			85 vs. 210	52	90	-38	13	13	3.45
			85 vs. 365	52	79	-27	13	13	2.451
			182 vs. 210	64	90	-26	13	13	2.36
			182 vs. 365	64	79	-15	13	13	1.362
			210 vs. 365	90	79	11	13	13	0.9986

## Sheet: IgG subclasss correlation
Spearman rank	IgG1	IgG2	IgG3	IgG4	AbC'	CD107	IFNγ	THP1 OPA	Neutrophil OPA	ADRB
IgG1	1	0.725581	0.789555	-0.0840763	0.788865	0.484688	0.546691	0.70087	0.681889	0.794644
IgG2	0.725581	1	0.567411	-0.0114874	0.697533	0.470592	0.601029	0.5256	0.453136	0.571247
IgG3	0.789555	0.567411	1	-0.166402	0.752414	0.303436	0.269453	0.756599	0.76658	0.761505
IgG4	-0.0840763	-0.0114874	-0.166402	1	-0.0830191	-0.361608	-0.18885	-0.0823878	0.121287	0.0630043
AbC'	0.788865	0.697533	0.752414	-0.0830191	1	0.52465	0.578265	0.684168	0.745455	0.822269
CD107	0.484688	0.470592	0.303436	-0.361608	0.52465	1	0.76585	0.321962	0.212637	0.446559
IFNγ	0.546691	0.601029	0.269453	-0.18885	0.578265	0.76585	1	0.357543	0.221862	0.462259
THP1 OPA	0.70087	0.5256	0.756599	-0.0823878	0.684168	0.321962	0.357543	1	0.689806	0.630748
Neutrophil OPA	0.681889	0.453136	0.76658	0.121287	0.745455	0.212637	0.221862	0.689806	1	0.831994
ADRB	0.794644	0.571247	0.761505	0.0630043	0.822269	0.446559	0.462259	0.630748	0.831994	1
P values	IgG1	IgG2	IgG3	IgG4	AbC'	CD107	IFNγ	THP1 OPA	Neutrophil OPA	ADRB
IgG1		2.51704e-08	1.8972e-10	0.587401	2.01744e-10	0.000855586	0.000123305	1.17363e-07	3.46096e-07	1.19719e-10
IgG2	2.51704e-08		5.90784e-05	0.941005	1.42789e-07	0.00126555	1.60308e-05	0.000248563	0.00200945	5.12745e-05
IgG3	1.8972e-10	5.90784e-05		0.280338	3.87814e-09	0.0452515	0.076932	2.8358e-09	1.30978e-09	1.94886e-09
IgG4	0.587401	0.941005	0.280338		0.592125	0.0158728	0.219556	0.594954	0.432884	0.684525
AbC'	2.01744e-10	1.42789e-07	3.87814e-09	0.592125		0.000256259	3.93858e-05	3.05242e-07	6.43998e-09	7.69103e-12
CD107	0.000855586	0.00126555	0.0452515	0.0158728	0.000256259		1.38764e-09	0.0330655	0.165815	0.00237713
IFNγ	0.000123305	1.60308e-05	0.076932	0.219556	3.93858e-05	1.38764e-09		0.0171836	0.147783	0.00158286
THP1 OPA	1.17363e-07	0.000248563	2.8358e-09	0.594954	3.05242e-07	0.0330655	0.0171836		2.22634e-07	4.44529e-06
Neutrophil OPA	3.46096e-07	0.00200945	1.30978e-09	0.432884	6.43998e-09	0.165815	0.147783	2.22634e-07		2.60933e-12
ADRB	1.19719e-10	5.12745e-05	1.94886e-09	0.684525	7.69103e-12	0.00237713	0.00158286	4.44529e-06	2.60933e-12
Confidence of interval	IgG1	IgG2	IgG3	IgG4	AbC'	CD107	IFNγ	THP1 OPA	Neutrophil OPA	ADRB
IgG1		0,5400 to 0,8439	0,6382 to 0,8822	-0,3795 to 0,2269	0,6371 to 0,8817	0,2107 to 0,6880	0,2899 to 0,7300	0,5034 to 0,8288	0,4758 to 0,8170	0,6462 to 0,8851
IgG2	0,5400 to 0,8439		0,3172 to 0,7438	-0,3155 to 0,2947	0,4985 to 0,8267	0,1932 to 0,6783	0,3624 to 0,7657	0,2626 to 0,7159	0,1718 to 0,6661	0,3223 to 0,7463
IgG3	0,6382 to 0,8822	0,3172 to 0,7438		-0,4487 to 0,1461	0,5806 to 0,8601	-0,001844 to 0,5570	-0,03885 to 0,5309	0,5870 to 0,8626	0,6024 to 0,8685	0,5945 to 0,8655
IgG4	-0,3795 to 0,2269	-0,3155 to 0,2947	-0,4487 to 0,1461		-0,3785 to 0,2279	-0,6005 to -0,06351	-0,4670 to 0,1234	-0,3780 to 0,2285	-0,1909 to 0,4112	-0,2469 to 0,3612
AbC'	0,6371 to 0,8817	0,4985 to 0,8267	0,5806 to 0,8601	-0,3785 to 0,2279		0,2614 to 0,7153	0,3317 to 0,7509	0,4791 to 0,8184	0,5700 to 0,8559	0,6904 to 0,9013
CD107	0,2107 to 0,6880	0,1932 to 0,6783	-0,001844 to 0,5570	-0,6005 to -0,06351	0,2614 to 0,7153		0,6012 to 0,8681	0,01869 to 0,5710	-0,09889 to 0,4862	0,1638 to 0,6615
IFNγ	0,2899 to 0,7300	0,3624 to 0,7657	-0,03885 to 0,5309	-0,4670 to 0,1234	0,3317 to 0,7509	0,6012 to 0,8681		0,05885 to 0,5975	-0,08929 to 0,4936	0,1830 to 0,6725
THP1 OPA	0,5034 to 0,8288	0,2626 to 0,7159	0,5870 to 0,8626	-0,3780 to 0,2285	0,4791 to 0,8184	0,01869 to 0,5710	0,05885 to 0,5975		0,4872 to 0,8219	0,4032 to 0,7848
Neutrophil OPA	0,4758 to 0,8170	0,1718 to 0,6661	0,6024 to 0,8685	-0,1909 to 0,4112	0,5700 to 0,8559	-0,09889 to 0,4862	-0,08929 to 0,4936	0,4872 to 0,8219		0,7061 to 0,9069
ADRB	0,6462 to 0,8851	0,3223 to 0,7463	0,5945 to 0,8655	-0,2469 to 0,3612	0,6904 to 0,9013	0,1638 to 0,6615	0,1830 to 0,6725	0,4032 to 0,7848	0,7061 to 0,9069

## Sheet: d0-d85 IgG subclasses
IgG1 OD (405nm)							IgG2 OD (405nm)							IgG3 OD (405nm)							IgG24OD (405nm)
Vaccinees	d0	d29	d57	d85			Vaccinees	d0	d29	d57	d85			Vaccinees	d0	d29	d57	d85			Vaccinees	d0	d29	d57	d85
3	0.082	0.273	1.457	1.441			3	0.08	0.0985	0.2585	0.4565			3	0.1825	0.286	1.137	1.102			3	0.0485	0.0505	0.11	0.1895
6	0.16	1.241	1.5805	1.578			6	0.079	0.19	0.251	0.5525			6	0.1885	0.684	1.1425	0.986			6	0.059	0.058	0.1355	0.2115
9	0.08	0.6805	1.4255	1.417			9	0.08	0.124	0.2255	0.2505			9	0.1395	0.529	1.5005	1.4665			9	0.068	0.0695	0.126	0.1555
12	0.175	0.6695	1.422	1.401			12	0.066	0.077	0.507	1.1985			12	0.1355	0.5685	1.376	1.469			12	0.054	0.0585	0.09	0.185
13	0.43	0.3855	1.497	1.4735			13	0.1195	0.0865	0.439	0.412			13	0.131	0.182	1.4785	1.285			13	0.0625	0.061	0.2165	0.211
14	0.21	1.1035	1.4905	1.481			14	0.0945	0.1035	0.2865	0.538			14	0.1195	0.679	1.326	1.4515			14	0.0735	0.081	0.131	0.322
15	0.08	0.6805	1.4255	1.417			15	0.08	0.124	0.2255	0.2505			15	0.1395	0.529	1.5005	1.4665			15	0.068	0.0695	0.126	0.1555
21	0.112	0.2265	1.379	1.3295			21	0.0515	0.06	0.221	0.316			21	0.134	0.2445	1.322	1.238			21	0.056	0.063	0.2275	0.274
22	0.276	0.9635	1.354	1.4035			22	0.068	0.097	0.159	0.171			22	0.0955	0.551	1.009	0.984			22	0.0655	0.072	0.0805	0.0955
28	0.0895	0.351	1.429	1.363			28	0.0515	0.0645	0.3795	0.287			28	0.082	0.2685	1.3165	1.123			28	0.052	0.063	0.133	0.1505
29	0.123	1.2755	1.4155	1.4035			29	0.0605	0.122	0.1955	0.2605			29	0.1125	1.136	1.2595	1.163			29	0.057	0.0735	0.1165	0.312
30	0.188	0.7075	1.5255	1.5465			30	0.052	0.0915	0.354	0.3925			30	0.418	1.231	1.484	1.4475			30	0.0995	0.0665	0.265	0.3105
32	0.2245	1.52	1.5235	1.4935			32	0.1045	0.2425	0.499	0.378			32	0.15	1.345	1.485	1.4245			32	0.0645	0.094	0.3085	0.311
13 samples of IgG1
							13 samplesIgG2							13 samples IgG3							13 samples IgG4
Friedman test
P value	<0,0001						Friedman test							Friedman test							Friedman test
Exact or approximate P value?	Approximate						P value	<0,0001						P value	<0,0001						P value	<0,0001
P value summary	****						Exact or approximate P value?	Approximate						Exact or approximate P value?	Approximate						Exact or approximate P value?	Approximate
Are means signif. different? (P < 0.05)	Yes						P value summary	****						P value summary	****						P value summary	****
Number of groups	7						Are means signif. different? (P < 0.05)	Yes						Are means signif. different? (P < 0.05)	Yes						Are means signif. different? (P < 0.05)	Yes
Friedman statistic	63.33						Number of groups	7						Number of groups	7						Number of groups	7
							Friedman statistic	67.52						Friedman statistic	71.01						Friedman statistic	75.79
Data summary
Number of treatments (columns)	7						Data summary							Data summary							Data summary
Number of subjects (rows)	13						Number of treatments (columns)	7						Number of treatments (columns)	7						Number of treatments (columns)	7
							Number of subjects (rows)	13						Number of subjects (rows)	13						Number of subjects (rows)	13
Number of families	1						Number of families	1						Number of families	1						Number of families	1
Number of comparisons per family	21						Number of comparisons per family	21						Number of comparisons per family	21						Number of comparisons per family	21
Alpha	0.05						Alpha	0.05						Alpha	0.05						Alpha	0.05
Dunn's multiple comparisons test	Rank sum diff,	Significant?	Summary	Adjusted P Value			Dunn's multiple comparisons test	Rank sum diff,	Significant?	Summary	Adjusted P Value			Dunn's multiple comparisons test	Rank sum diff,	Significant?	Summary	Adjusted P Value			Dunn's multiple comparisons test	Rank sum diff,	Significant?	Summary	Adjusted P Value
0 vs. 29	-14	No	ns	>0,9999			0 vs. 29	-13	No	ns	>0,9999			0 vs. 29	-27	No	ns	0.299			0 vs. 29	-7	No	ns	>0,9999
0 vs. 57	-67	Yes	****	<0,0001			0 vs. 57	-40	Yes	**	0.0059			0 vs. 57	-74	Yes	****	<0,0001			0 vs. 57	-24	No	ns	0.6162
0 vs. 85	-53	Yes	****	<0,0001			0 vs. 85	-61	Yes	****	<0,0001			0 vs. 85	-66	Yes	****	<0,0001			0 vs. 85	-36	Yes	*	0.0227
0 vs. 182	-44	Yes	**	0.0014			0 vs. 182	-43	Yes	**	0.002			0 vs. 182	-36	Yes	*	0.0227			0 vs. 182	-48	Yes	***	0.0003
0 vs. 210	-62	Yes	****	<0,0001			0 vs. 210	-76	Yes	****	<0,0001			0 vs. 210	-53	Yes	****	<0,0001			0 vs. 210	-74	Yes	****	<0,0001
0 vs. 365	-26	No	ns	0.3834			0 vs. 365	-33	No	ns	0.0575			0 vs. 365	-17	No	ns	>0,9999			0 vs. 365	-63	Yes	****	<0,0001
29 vs. 57	-53	Yes	****	<0,0001			29 vs. 57	-27	No	ns	0.299			29 vs. 57	-47	Yes	***	0.0004			29 vs. 57	-17	No	ns	>0,9999
29 vs. 85	-39	Yes	**	0.0084			29 vs. 85	-48	Yes	***	0.0003			29 vs. 85	-39	Yes	**	0.0084			29 vs. 85	-29	No	ns	0.1779
29 vs. 182	-30	No	ns	0.1356			29 vs. 182	-30	No	ns	0.1356			29 vs. 182	-9	No	ns	>0,9999			29 vs. 182	-41	Yes	**	0.0041
29 vs. 210	-48	Yes	***	0.0003			29 vs. 210	-63	Yes	****	<0,0001			29 vs. 210	-26	No	ns	0.3834			29 vs. 210	-67	Yes	****	<0,0001
29 vs. 365	-12	No	ns	>0,9999			29 vs. 365	-20	No	ns	>0,9999			29 vs. 365	10	No	ns	>0,9999			29 vs. 365	-56	Yes	****	<0,0001
57 vs. 85	14	No	ns	>0,9999			57 vs. 85	-21	No	ns	>0,9999			57 vs. 85	8	No	ns	>0,9999			57 vs. 85	-12	No	ns	>0,9999
57 vs. 182	23	No	ns	0.7727			57 vs. 182	-3	No	ns	>0,9999			57 vs. 182	38	Yes	*	0.0118			57 vs. 182	-24	No	ns	0.6162
57 vs. 210	5	No	ns	>0,9999			57 vs. 210	-36	Yes	*	0.0227			57 vs. 210	21	No	ns	>0,9999			57 vs. 210	-50	Yes	***	0.0001
57 vs. 365	41	Yes	**	0.0041			57 vs. 365	7	No	ns	>0,9999			57 vs. 365	57	Yes	****	<0,0001			57 vs. 365	-39	Yes	**	0.0084
85 vs. 182	9	No	ns	>0,9999			85 vs. 182	18	No	ns	>0,9999			85 vs. 182	30	No	ns	0.1356			85 vs. 182	-12	No	ns	>0,9999
85 vs. 210	-9	No	ns	>0,9999			85 vs. 210	-15	No	ns	>0,9999			85 vs. 210	13	No	ns	>0,9999			85 vs. 210	-38	Yes	*	0.0118
85 vs. 365	27	No	ns	0.299			85 vs. 365	28	No	ns	0.2315			85 vs. 365	49	Yes	***	0.0002			85 vs. 365	-27	No	ns	0.299
182 vs. 210	-18	No	ns	>0,9999			182 vs. 210	-33	No	ns	0.0575			182 vs. 210	-17	No	ns	>0,9999			182 vs. 210	-26	No	ns	0.3834
182 vs. 365	18	No	ns	>0,9999			182 vs. 365	10	No	ns	>0,9999			182 vs. 365	19	No	ns	>0,9999			182 vs. 365	-15	No	ns	>0,9999
210 vs. 365	36	Yes	*	0.0227			210 vs. 365	43	Yes	**	0.002			210 vs. 365	36	Yes	*	0.0227			210 vs. 365	11	No	ns	>0,9999
Test details	Rank sum 1	Rank sum 2	Rank sum diff,	n1		n2	Test details	Rank sum 1	Rank sum 2	Rank sum diff,	n1	n2	Z	Test details	Rank sum 1	Rank sum 2	Rank sum diff,	n1	n2	Z	Test details	Rank sum 1	Rank sum 2	Rank sum diff,	n1	n2	Z
0 vs. 29	14	28	-14	13		13	0 vs. 29	14	27	-13	13	13	1.18	0 vs. 29	13	40	-27	13	13	2.451	0 vs. 29	16	23	-7	13	13	0.6355
0 vs. 57	14	81	-67	13		13	0 vs. 57	14	54	-40	13	13	3.631	0 vs. 57	13	87	-74	13	13	6.718	0 vs. 57	16	40	-24	13	13	2.179
0 vs. 85	14	67	-53	13		13	0 vs. 85	14	75	-61	13	13	5.538	0 vs. 85	13	79	-66	13	13	5.992	0 vs. 85	16	52	-36	13	13	3.268
0 vs. 182	14	58	-44	13		13	0 vs. 182	14	57	-43	13	13	3.904	0 vs. 182	13	49	-36	13	13	3.268	0 vs. 182	16	64	-48	13	13	4.358
0 vs. 210	14	76	-62	13		13	0 vs. 210	14	90	-76	13	13	6.9	0 vs. 210	13	66	-53	13	13	4.812	0 vs. 210	16	90	-74	13	13	6.718
0 vs. 365	14	40	-26	13		13	0 vs. 365	14	47	-33	13	13	2.996	0 vs. 365	13	30	-17	13	13	1.543	0 vs. 365	16	79	-63	13	13	5.719
29 vs. 57	28	81	-53	13		13	29 vs. 57	27	54	-27	13	13	2.451	29 vs. 57	40	87	-47	13	13	4.267	29 vs. 57	23	40	-17	13	13	1.543
29 vs. 85	28	67	-39	13		13	29 vs. 85	27	75	-48	13	13	4.358	29 vs. 85	40	79	-39	13	13	3.541	29 vs. 85	23	52	-29	13	13	2.633
29 vs. 182	28	58	-30	13		13	29 vs. 182	27	57	-30	13	13	2.724	29 vs. 182	40	49	-9	13	13	0.8171	29 vs. 182	23	64	-41	13	13	3.722
29 vs. 210	28	76	-48	13		13	29 vs. 210	27	90	-63	13	13	5.719	29 vs. 210	40	66	-26	13	13	2.36	29 vs. 210	23	90	-67	13	13	6.083
29 vs. 365	28	40	-12	13		13	29 vs. 365	27	47	-20	13	13	1.816	29 vs. 365	40	30	10	13	13	0.9078	29 vs. 365	23	79	-56	13	13	5.084
57 vs. 85	81	67	14	13		13	57 vs. 85	54	75	-21	13	13	1.906	57 vs. 85	87	79	8	13	13	0.7263	57 vs. 85	40	52	-12	13	13	1.089
57 vs. 182	81	58	23	13		13	57 vs. 182	54	57	-3	13	13	0.2724	57 vs. 182	87	49	38	13	13	3.45	57 vs. 182	40	64	-24	13	13	2.179
57 vs. 210	81	76	5	13		13	57 vs. 210	54	90	-36	13	13	3.268	57 vs. 210	87	66	21	13	13	1.906	57 vs. 210	40	90	-50	13	13	4.539
57 vs. 365	81	40	41	13		13	57 vs. 365	54	47	7	13	13	0.6355	57 vs. 365	87	30	57	13	13	5.175	57 vs. 365	40	79	-39	13	13	3.541
85 vs. 182	67	58	9	13		13	85 vs. 182	75	57	18	13	13	1.634	85 vs. 182	79	49	30	13	13	2.724	85 vs. 182	52	64	-12	13	13	1.089
85 vs. 210	67	76	-9	13		13	85 vs. 210	75	90	-15	13	13	1.362	85 vs. 210	79	66	13	13	13	1.18	85 vs. 210	52	90	-38	13	13	3.45
85 vs. 365	67	40	27	13		13	85 vs. 365	75	47	28	13	13	2.542	85 vs. 365	79	30	49	13	13	4.448	85 vs. 365	52	79	-27	13	13	2.451
182 vs. 210	58	76	-18	13		13	182 vs. 210	57	90	-33	13	13	2.996	182 vs. 210	49	66	-17	13	13	1.543	182 vs. 210	64	90	-26	13	13	2.36
182 vs. 365	58	40	18	13		13	182 vs. 365	57	47	10	13	13	0.9078	182 vs. 365	49	30	19	13	13	1.725	182 vs. 365	64	79	-15	13	13	1.362
210 vs. 365	76	40	36	13		13	210 vs. 365	90	47	43	13	13	3.904	210 vs. 365	66	30	36	13	13	3.268	210 vs. 365	90	79	11	13	13	0.9986
