# Supplementary material for: IgG Subclass Switch in Volunteers Repeatedly Immunized with the Full-Length Plasmodium falciparum Merozoite Surface Protein 1 (MSP1)
Source: Vaccines (Basel). 2024 Feb 17;12(2):208. doi: 10.3390/vaccines12020208 (PMC10893298; doi:10.3390/vaccines12020208)
Supplement: Supplementary file 1 [file vaccines-12-00208-s001.zip › Rathay et al. Supp. Data S2.xlsx]

## Sheet: Titres IgG subclasses
Kenya (WHO)			replicates n=5
	1	2	3	4	5
IgG1	1515.2	1332.9	1692.6	1593.7	611.5
IgG2	24.681	21.8475	29.8105	30.757	77.7
IgG3	8621	4832.4	5726	7261.5	5383.5
IgG4	264	520.7	427.945	249.85	114
Malawi			replicates n=5
	1	2	3	4	5
IgG1	4201.15	3969.15	2319.2	3699.4	2916.1
IgG2	78.84	152.05	197.105	134.9	96.8
IgG3	27845.5	28022	27874.5	29211	21795.5
IgG4	1668.3	1696.3	1070.5	1359.15	1168.8
Burkina Faso				individuals n=8						Friedman test Burkina Faso			Dunn's multiple comparisons test	Rank sum diff,	Significant?	Summary	Adjusted P Value
	Nouna 1	Nouna 2	Nouna 3	Nouna 5	Nouna 6	Nouna 7	Nouna 8	Nouna 9		P value	0.0002		IgG1 vs. IgG2	12	No	ns	0.1208
IgG1	79.315	2418.4	208.417	306.265	5638.5	1146.03	7123.5	846.15		Exact or approximate P value?	Approximate		IgG1 vs. IgG3	-10	No	ns	0.3168
IgG2	4.23325	49.2675	38.1888	12.2617	34.6	502.995	19.8945	20.825		P value summary	***		IgG1 vs. IgG4	6	No	ns	>0,9999
IgG3	840.475	5570.75	6578.83	8204.5	34451.2	1627.6	33851.2	9411.5		Are means signif. different? (P < 0.05)	Yes		IgG2 vs. IgG3	-22	Yes	***	0.0001
IgG4	1.585	1246.03	282.432	344.1	91.7725	241.218	1036.58	118.312		Number of groups	4		IgG2 vs. IgG4	-6	No	ns	>0,9999
										Friedman statistic	19.8		IgG3 vs. IgG4	16	Yes	*	0.0117
										Data summary			Test details	Rank sum 1	Rank sum 2	Rank sum diff,	n1	n2	Z
										Number of treatments (columns)	4		IgG1 vs. IgG2	22	10	12	8	8	2.324
										Number of subjects (rows)	8		IgG1 vs. IgG3	22	32	-10	8	8	1.936
													IgG1 vs. IgG4	22	16	6	8	8	1.162
													IgG2 vs. IgG3	10	32	-22	8	8	4.26
													IgG2 vs. IgG4	10	16	-6	8	8	1.162
													IgG3 vs. IgG4	32	16	16	8	8	3.098
