# Supplementary material for: IgG Subclass Switch in Volunteers Repeatedly Immunized with the Full-Length Plasmodium falciparum Merozoite Surface Protein 1 (MSP1)
Source: Vaccines (Basel). 2024 Feb 17;12(2):208. doi: 10.3390/vaccines12020208 (PMC10893298; doi:10.3390/vaccines12020208)
Supplement: Supplementary file 1 [file vaccines-12-00208-s001.zip › Rathay et al. Supp. Data S3.xlsx]

## Sheet: Correlat. IgG sub. Fc-functions
				IgG subclasses						Fc-mediated functions
	Vaccinees		IgG1	IgG2	IgG3	IgG4		AbC'	CD107	IFNγ	THP1 OPA	Neutrophil OPA	ADRB
	3		5336.3	116.5	909.2	67.3		2.3465	26.85	16.25	15.3	35.1	16440
	6		4191.9	186.2	1259.3	17.7		2.137	25.5	15.4	30.75	26.6	14486
	9		5377.3	58.3	1862.3	48.9		2.2715	27.1	12.8	38.65	33.1	17016.5
	12		10010	382.9	3521.4	7.8		2.5235	24.25	13.55	33.9	33.3	13651
	13		1599.8	57.5	857.4	8.7		1.873	24.1	9.31	17.2	33.55	11298
d85	14		3773.6	85.2	1247.3	74		2.402	22.75	10.91	38.65	45.95	15825
	15		1560.2	27.744	650.7	20.7		1.586	21.75	8.72	14.9	32.35	10392
	21		9959	90.7	889.3	32.4		2.3625	23.6	12.7	22.25	38.55	20083
	28		2970.7	78.2	662.5	43.9		2.355	22.65	9.48	11.45	27.75	10349
	29		24646.3	128.7	1591.6	163.2		2.2245	26.1	9.26	24.9	34.05	20461.5
	32		3242.9	97.3	3711.8	42.8		2.2515	21.15	9.65	22.65	39.2	19881
	3		1994.9	64.1	210.7	123.9		2.235	25.8	15.8	13.45	26.25	12062
	6		1419	93.4	210.7	67		0.6995	25.1	14.1	4.3	8.95	6621.5
	9		2435.9	57.9	413	1101.7		1.959	24.9	13.9	13.35	28.25	9592.5
	12		8228.8	244.8	855.7	126.7		1.4175	23	10.9	21	27.65	7565.5
	13		595.3	24	218.9	43.8		0.2085	23.65	7.27	3.82	21.15	3459
d182	14		435.9	74.9	268.8	1346.2		0.359	20.3	8.05	13.2	23.3	3410
	15		171.5	27.7	114.2	1185.4		0.2355	19.8	6.27	5.36	17.9	2676.5
	21		2330.3	60.4	102.3	13.1		1.294	24.3	12.35	5.12	16.7	9199
	28		1425.7	28.5	125.3	159.7		0.6625	18.4	7.18	2	12.05	1823
	29		5039.4	62.6	278.9	822.3		1.1055	22.5	11.05	17.65	24.45	8753.5
	32		297	35.8	467.2	528		0.233	19.85	8.87	18.95	21.35	3253.5
	3		3229.4	135.8	342.9	333.1		2.451	27.65	18.75	24.7	30.4	29332
	6		2580.9	172.3	342.9	127.9		2.2885	26.6	17.35	13	28.15	19029.5
	9		5110.8	99.9	833.7	3221.2		2.38	24.65	14.6	36.6	40.95	16673
	12		18867.3	440.2	3401.1	457.1		2.431	25.35	14.8	15.25	38.05	18352
	13		1299.7	34	481.2	119.2		1.638	25	8.48	14.6	36.9	11603.5
d210	14		2673.7	170.1	588.7	3318.7		2.2035	22.35	11.55	10.55	40.3	17197.5
	15		1104	59.1	217.4	2937.2		1.673	21.3	8.65	14.5	30.45	14398
	21		3727.7	72.2	321.6	54.8		1.11	24.25	12.6	19.35	34	16487.5
	28		3061	100.7	413.5	1429.4		2.009	23.4	9.35	10.46	28.85	13417.5
	29		9901.5	180.2	488.2	1362.5		2.1205	23	12.7	12.2	38.2	22859
	32		3015.9	27.3	1044.1	1365.7		1.2315	21.65	10.14	13.28	34.55	23614
	3		425.9	33	5.8	79.9		0.4305	22.8	12.2	6.53	14.7	1113
	6		422.8	62.8	28.9	45.1		0.349	24.75	13	4.52	9.79	724
	9		517.3	11.8	36.5	300.5		0.468	22.55	11.65	8.94	18.35	2545
	12		3056.8	220.4	470.8	241.9		1.5935	23.5	11.65	26.1	26.85	7537.5
	13		169.058	50.8	43.8	26.6		0.2165	24.05	10.21	2.47	19.3	1549.5
d365	14		635.55	40.8	64.5	1028.8		1.4075	22	8.81	13.4	30.6	4754
	15		436.2	28.7	60.1	1424.4		0.344	21.3	6.08	6	22.5	4598
	21		1664.9	32	98.7	48.2		0.079	23.9	11.2	7.06	16.8	3393.5
	28		405.4	38.4	119.4	316.1		0.149	18.9	5.2	4.45	15.35	1034.5
	29		2262	68.2	145.8	1362.5		1.019	21.4	10.3	14.35	31.25	8014
	32		186	29.5	64.8	179.4		0.163	20.25	7.79	8.41	17.95	2143
Spearman rank	IgG1	IgG2	IgG3	IgG4	AbC'	CD107	IFNγ	THP1 OPA	Neutrophil OPA	ADRB
IgG1	1	0.725581	0.789555	-0.0840763	0.788865	0.484688	0.546691	0.70087	0.681889	0.794644
IgG2	0.725581	1	0.567411	-0.0114874	0.697533	0.470592	0.601029	0.5256	0.453136	0.571247
IgG3	0.789555	0.567411	1	-0.166402	0.752414	0.303436	0.269453	0.756599	0.76658	0.761505
IgG4	-0.0840763	-0.0114874	-0.166402	1	-0.0830191	-0.361608	-0.18885	-0.0823878	0.121287	0.0630043
AbC'	0.788865	0.697533	0.752414	-0.0830191	1	0.52465	0.578265	0.684168	0.745455	0.822269
CD107	0.484688	0.470592	0.303436	-0.361608	0.52465	1	0.76585	0.321962	0.212637	0.446559
IFNγ	0.546691	0.601029	0.269453	-0.18885	0.578265	0.76585	1	0.357543	0.221862	0.462259
THP1 OPA	0.70087	0.5256	0.756599	-0.0823878	0.684168	0.321962	0.357543	1	0.689806	0.630748
Neutrophil OPA	0.681889	0.453136	0.76658	0.121287	0.745455	0.212637	0.221862	0.689806	1	0.831994
ADRB	0.794644	0.571247	0.761505	0.0630043	0.822269	0.446559	0.462259	0.630748	0.831994	1
P-values	IgG1	IgG2	IgG3	IgG4	AbC'	CD107	IFNγ	THP1 OPA	Neutrophil OPA	ADRB
IgG1		2.51704e-08	1.8972e-10	0.587401	2.01744e-10	0.000855586	0.000123305	1.17363e-07	3.46096e-07	1.19719e-10
IgG2	2.51704e-08		5.90784e-05	0.941005	1.42789e-07	0.00126555	1.60308e-05	0.000248563	0.00200945	5.12745e-05
IgG3	1.8972e-10	5.90784e-05		0.280338	3.87814e-09	0.0452515	0.076932	2.8358e-09	1.30978e-09	1.94886e-09
IgG4	0.587401	0.941005	0.280338		0.592125	0.0158728	0.219556	0.594954	0.432884	0.684525
AbC'	2.01744e-10	1.42789e-07	3.87814e-09	0.592125		0.000256259	3.93858e-05	3.05242e-07	6.43998e-09	7.69103e-12
CD107	0.000855586	0.00126555	0.0452515	0.0158728	0.000256259		1.38764e-09	0.0330655	0.165815	0.00237713
IFNγ	0.000123305	1.60308e-05	0.076932	0.219556	3.93858e-05	1.38764e-09		0.0171836	0.147783	0.00158286
THP1 OPA	1.17363e-07	0.000248563	2.8358e-09	0.594954	3.05242e-07	0.0330655	0.0171836		2.22634e-07	4.44529e-06
Neutrophil OPA	3.46096e-07	0.00200945	1.30978e-09	0.432884	6.43998e-09	0.165815	0.147783	2.22634e-07		2.60933e-12
ADRB	1.19719e-10	5.12745e-05	1.94886e-09	0.684525	7.69103e-12	0.00237713	0.00158286	4.44529e-06	2.60933e-12

## Sheet: GIA vaccinees
		Vaccinees
Timepoint	3	14	15	30
d0	26.9	0	1	0
d85	38.2	22.3	8.5	3
d182	43.2	27.3	36.5	26.6
d210	33.4	3.9	16.4	16.4
d365	36.3	19.1	0	23.6
Spearman rak	IgG1	IgG2	IgG3	IgG4
GIA	0.430824	0.416813	0.360771	0.157618
P-values	IgG1	IgG2	IgG3	IgG4
GIA	0.162695	0.177918	0.247943	0.6227
