# Supplementary material for: IgG Subclass Switch in Volunteers Repeatedly Immunized with the Full-Length Plasmodium falciparum Merozoite Surface Protein 1 (MSP1)
Source: Vaccines (Basel). 2024 Feb 17;12(2):208. doi: 10.3390/vaccines12020208 (PMC10893298; doi:10.3390/vaccines12020208)
Supplement: Supplementary file 1 [file vaccines-12-00208-s001.zip › Rathay et al. Supp. Data S4.xlsx]

## Sheet: Total IgG avidity index
	D0 vaccinees (OD-405nm)													D85 vaccinees (OD-405nm)													D182 vaccinees (OD-405nm)													D210 vaccinees (OD-405nm)
NaSCN (M)	3	6	9	12	13	14	15	21	22	28	29	32		3	6	9	12	13	14	15	21	22	28	29	32		3	6	9	12	13	14	15	21	22	28	32		3	6	9	12	13	14	15	21	22	28	29
0	0.2765	0.1835	0.0895	0.3175	0.3145	0.338	0.8585	0.3125	0.591	0.147	0.1675	0.2445		1.554	1.4915	1.425	1.857	1.558	1.552	1.547	1.34	1.2375	1.2545	1.287	1.225		1.631	1.5715	1.4695	1.4325	1.6855	1.7605	1.676	1.4465	1.4545	1.4825	1.289		1.5265	1.6925	1.598	1.7335	1.643	1.73	1.7145	1.463	1.515	1.4735	1.341
1	0.1245	0.127	0.0725	0.246	0.196	0.5465	0.184	0.173	0.198	0.093	0.1045	0.1825		1.3575	1.2665	1.3165	1.69	1.331	1.4345	1.373	1.1105	0.939	0.9825	0.9865	1.051		1.4035	1.389	1.4125	1.1165	1.3755	1.411	1.5475	1.4515	1.212	1.204	1.1895		1.412	1.5125	1.568	1.635	1.612	1.5755	1.629	1.1	1.3765	1.3015	1.1995
2	0.1085	0.1055	0.0855	0.1515	0.19	0.1955	0.077	0.1215	0.0905	0.273	0.0905	0.171		1.0335	1.103	1.087	1.648	1.0975	1.3135	1.2125	0.9275	0.689	0.743	0.833	0.865		1.0865	1.24	1.2385	0.8885	1.291	1.238	1.425	1.07	1.1075	1.0005	1.053		1.291	1.3585	1.481	1.506	1.4555	1.473	1.566	1.0595	1.349	1.1585	1.175
3	0.109	0.0945	0.135	0.133	0.1125	0.169	0.0765	0.107	0.085	0.079	0.0805	0.148		0.7775	0.7665	0.87	1.15	0.882	1.1035	1.032	0.765	0.5315	0.553	0.64	0.6775		0.801	0.938	1.011	0.6085	1.156	1.0655	1.2925	0.899	1.063	0.857	0.8925		1.0605	1.261	1.4495	1.348	1.392	1.432	1.499	1.024	1.306	1.171	1.0435
4	0.1135	0.0835	0.0815	0.22	0.2525	0.1705	0.0775	0.1165	0.08	0.087	0.076	0.1575		0.5185	0.559	0.6395	0.994	0.6525	0.829	0.903	0.5865	0.3635	0.3885	0.487	0.5475		0.5875	0.794	0.772	0.5275	0.9975	0.6945	1.155	0.597	0.75	0.717	0.8095		0.8005	1.05	1.431	1.273	1.298	1.1235	1.509	0.7675	1.0875	0.95	0.8785
5	0.0975	0.076	0.07	0.232	0.0985	0.1275	0.1065	0.096	0.0945	0.0775	0.073	0.1265		0.424	0.419	0.4685	0.773	0.4815	0.669	0.721	0.44	0.2815	0.281	0.4065	0.399		0.3825	0.562	0.592	0.3885	0.7785	0.7015	1.102	0.526	0.645	0.5095	0.6475		0.6665	0.9675	1.2735	1.0525	1.0995	1.1175	1.373	0.643	0.944	0.862	0.81
6	0.1025	0.072	0.069	0.1695	0.1075	0.165	0.087	0.097	0.124	0.0845	0.074	0.1235		0.4395	0.3525	0.317	0.621	0.3165	0.457	0.5225	0.303	0.227	0.244	0.261	0.241		0.4545	0.4265	0.4265	0.296	0.5275	0.486	0.816	0.4095	0.4505	0.3925	0.3025		0.541	0.769	1.084	0.802	0.9045	0.918	1.2065	0.41	0.678	0.7235	0.576
7	0.152	0.0755	0.1035	0.176	0.1265	0.12	0.078	0.134	0.095	0.0785	0.075	0.123		0.571	0.352	0.325	0.667	0.327	0.496	0.4345	0.3405	0.2115	0.35	0.2865	0.285		0.6185	0.447	0.4435	0.3335	0.6345	0.4965	0.763	0.409	0.4215	0.3995	0.3945		0.6105	0.6675	1.0055	0.847	0.8215	0.8835	1.136	0.4235	0.8345	0.6275	0.501
Avity Index
Vaccinees	85	182	210	365
3	3.85626	3.82789	4.96647	3.39993
6	3.74334	4.2654	5.64716	4.99359
9	4.03125	4.59347	10.0548	5.86802
12	4.75855	3.39227	6.40391	3.78864
13	3.77571	4.84428	7.17203	4.42373
14	4.69275	4.05082	6.80794	4.70075
15	4.69951	6.39232	10.9532	5.40968
21	3.87541	4.24519	4.39217	5.51986
22	3.09453	4.55867	6.78076	7.14721
28	3.29862	4.00032	6.01312	5.25399
29	3.53482	4.12421	5.71253	7.64374
30	3.83814	4.79366	5.65782	5.04744
32	3.83898	4.7451	5.79725	4.39541
Friedman test			Dunn's multiple comparisons test	Rank sum diff,	Significant?	Summary	Adjusted P Value
P value	<0,0001		85 vs. 182	-9	No	ns	>0,9999
Exact or approximate P value?	Approximate		85 vs. 210	-39	Yes	****	<0,0001
P value summary	****		85 vs. 365	-19	No	ns	0.1844
Are means signif. different? (P < 0.05)	Yes		85 vs. Kenya	-38	Yes	****	<0,0001
Number of groups	5		182 vs. 210	-30	Yes	**	0.002
Friedman statistic	36.98		182 vs. 365	-10	No	ns	>0,9999
			182 vs. Kenya	-29	Yes	**	0.0032
Data summary			210 vs. 365	20	No	ns	0.1311
Number of treatments (columns)	5		210 vs. Kenya	1	No	ns	>0,9999
Number of subjects (rows)	13		365 vs. Kenya	-19	No	ns	0.1844
			Test details	Rank sum 1	Rank sum 2	Rank sum diff,	n1	n2	Z
			85 vs. 182	18	27	-9	13	13	1.116
			85 vs. 210	18	57	-39	13	13	4.837
			85 vs. 365	18	37	-19	13	13	2.357
			85 vs. Kenya	18	56	-38	13	13	4.713
			182 vs. 210	27	57	-30	13	13	3.721
			182 vs. 365	27	37	-10	13	13	1.24
			182 vs. Kenya	27	56	-29	13	13	3.597
			210 vs. 365	57	37	20	13	13	2.481
			210 vs. Kenya	57	56	1	13	13	0.124
			365 vs. Kenya	37	56	-19	13	13	2.357
[truncated: 25 more columns]

## Sheet: Corr. Avidity vs IgG subclass
	Vaccinees	Avidity Index)	IgG1	IgG2	IgG3	IgG4		Spearman rank	avidity (M)	IgG1	IgG2	IgG3	IgG4
	3	3.85626	1.441	0.4565	1.102	0.1895		Avidity Index	1	0.0198941	0.0299686	-0.0972486	0.526053
	6	3.74334	1.578	0.5525	0.986	0.2115		IgG1	0.0198941	1	0.528637	0.628199	0.058109
	9	4.03125	1.41	0.2265	0.916	0.4355		IgG2	0.0299686	0.528637	1	0.672629	0.20485
	12	4.75855	1.401	1.1985	1.469	0.185		IgG3	-0.0972486	0.628199	0.672629	1	-0.0140466
	13	3.77571	1.4735	0.412	1.285	0.211		IgG4	0.526053	0.058109	0.20485	-0.0140466	1
d85	14	4.69275	1.481	0.538	1.4515	0.322
	15	4.69951	1.417	0.2505	1.4665	0.1555
	21	3.87541	1.3295	0.316	1.238	0.274		P-value	avidity (M)	IgG1	IgG2	IgG3	IgG4
	22	3.09453	1.4035	0.171	0.984	0.0955		Avidity Index		0.888672	0.832965	0.492807	6.19546e-05
	28	3.29862	1.363	0.287	1.123	0.1505		IgG1	0.888672		5.61302e-05	6.17472e-07	0.6824
	29	3.53482	1.4035	0.2605	1.163	0.312		IgG2	0.832965	5.61302e-05		4.71947e-08	0.145176
	30	3.83814	1.5465	0.3925	1.4475	0.3105		IgG3	0.492807	6.17472e-07	4.71947e-08		0.92127
	32	3.83898	1.4935	0.378	1.4245	0.311		IgG4	6.19546e-05	0.6824	0.145176	0.92127
	3	3.82789	1.482	0.296	0.5505	0.122
	6	4.2654	1.451	0.311	0.5115	0.2955
	9	4.59347	1.4585	0.4125	1.2015	1.1725
	12	3.39227	1.389	0.9695	1.243	0.2095
	13	4.84428	1.478	0.2485	0.772	0.274
d182	14	4.05082	1.37	0.3065	0.742	0.944
	15	6.39232	1.41	0.2265	0.916	0.4355
	21	4.24519	1.215	0.157	0.495	1.012
	22	4.55867	1.409	0.225	0.7025	0.185
	28	4.00032	1.3255	0.23	0.3985	0.521
	30	4.79366	1.525	0.3205	1.2975	0.598
	32	4.7451	1.462	0.24	0.832	0.8565
	29	4.12421	1.408	0.1965	0.825	0.905
	3	4.96647	1.434	0.605	1.0325	0.65
	6	5.64716	1.5215	0.7465	0.839	0.743
	9	10.0548	1.253	0.2155	0.29	0.693
	12	6.40391	1.432	1.141	1.399	1.021
	13	7.17203	1.4165	0.783	1.218	1.0885
d210	14	6.80794	1.469	0.7105	1.269	1.2625
	15	10.9532	1.4585	0.4125	1.2015	1.1725
	21	4.39217	1.3545	0.425	0.9665	1.3185
	22	6.78076	1.419	0.3655	1.1315	0.597
	28	6.01312	1.428	0.528	0.9005	1.116
	29	5.71253	1.4305	0.424	1.082	1.1705
	30	5.65782	1.5125	0.65	1.3315	1.367
	32	5.79725	1.559	0.6995	1.3245	1.462
	3	3.39993	1.3425	0.259	0.3395	0.3855
	6	4.99359	1.3705	0.3875	0.2115	0.326
	9	5.86802	0.134	0.1175	0.0875	0.085
	12	3.78864	1.31	0.8515	1.0205	0.826
	13	4.42373	1.275	0.2225	0.364	0.51
d365	14	4.70075	1.3765	0.2985	0.4635	1.065
	15	5.40968	1.253	0.2155	0.29	0.693
	21	5.51986	1.29	0.2645	0.4525	1.324
	22	7.14721	1.2825	0.1225	0.28	0.32
	28	5.25399	1.203	0.165	0.2535	0.777
	29	7.64374	1.4	0.213	0.676	1.046
	30	5.04744	1.4965	0.2945	1.089	1.2085
	32	4.39541	1.398	0.224	0.479	1.053

## Sheet: Corr. Avidity vs Fc- functions
	Vaccinees	Avidity Index	AbC'	CD107	IFNγ	THP1 OPA	Neutrophil OPA	ADRB		Spearman rank	Avidity Index	AbC'	CD107	IFNγ	THP1 OPA	Neutrophil OPA	ADRB
	3	3.85626	2.3465	26.85	16.25	15.3	35.1	16440		Avidity Index	1	-0.0972516	-0.1602	-0.0983861	-0.211917	0.153911	0.063284
	6	3.74334	2.137	25.5	15.4	30.75	26.6	14486		AbC'	-0.0972516	1	0.52465	0.578265	0.684168	0.745455	0.822269
	9	4.03125	2.2715	27.1	12.8	38.65	33.1	17016.5		CD107	-0.1602	0.52465	1	0.76585	0.321962	0.212637	0.446559
	12	4.75855	2.5235	24.25	13.55	33.9	33.3	13651		IFNγ	-0.0983861	0.578265	0.76585	1	0.357543	0.221862	0.462259
d85	13	3.77571	1.873	24.1	9.31	17.2	33.55	11298		THP1 OPA	-0.211917	0.684168	0.321962	0.357543	1	0.689806	0.630748
	14	4.69275	2.402	22.75	10.91	38.65	45.95	15825		Neutrophil OPA	0.153911	0.745455	0.212637	0.221862	0.689806	1	0.831994
	15	4.69951	1.586	21.75	8.72	14.9	32.35	10392		ADRB	0.063284	0.822269	0.446559	0.462259	0.630748	0.831994	1
	12	3.87541	2.3625	23.6	12.7	22.25	38.55	20083
	28	3.29862	2.355	22.65	9.48	11.45	27.75	10349
	29	3.53482	2.2245	26.1	9.26	24.9	34.05	20461.5		P-value	Avidity Index	AbC'	CD107	IFNγ	THP1 OPA	Neutrophil OPA	ADRB
	3	3.82789	2.235	25.8	15.8	13.45	26.25	12062		Avidity Index		0.529995	0.298905	0.525183	0.167287	0.318522	0.683198
	6	4.2654	0.6995	25.1	14.1	4.3	8.95	6621.5		AbC'	0.529995		0.000256259	3.93858e-05	3.05242e-07	6.43998e-09	7.69103e-12
	9	4.59347	1.959	24.9	13.9	13.35	28.25	9592.5		CD107	0.298905	0.000256259		1.38764e-09	0.0330655	0.165815	0.00237713
	12	3.39227	1.4175	23	10.9	21	27.65	7565.5		IFNγ	0.525183	3.93858e-05	1.38764e-09		0.0171836	0.147783	0.00158286
d182	13	4.84428	0.2085	23.65	7.27	3.82	21.15	3459		THP1 OPA	0.167287	3.05242e-07	0.0330655	0.0171836		2.22634e-07	4.44529e-06
	14	4.05082	0.359	20.3	8.05	13.2	23.3	3410		Neutrophil OPA	0.318522	6.43998e-09	0.165815	0.147783	2.22634e-07		2.60933e-12
	15	6.39232	0.2355	19.8	6.27	5.36	17.9	2676.5		ADRB	0.683198	7.69103e-12	0.00237713	0.00158286	4.44529e-06	2.60933e-12
	21	4.24519	1.294	24.3	12.35	5.12	16.7	9199
	28	4.00032	0.6625	18.4	7.18	2	12.05	1823
	29	4.12421	1.1055	22.5	11.05	17.65	24.45	8753.5
	3	4.96647	2.451	27.65	18.75	24.7	30.4	29332
	6	5.64716	2.2885	26.6	17.35	13	28.15	19029.5
	9	10.0548	2.38	24.65	14.6	36.6	40.95	16673
	12	6.40391	2.431	25.35	14.8	15.25	38.05	18352
d210	13	7.17203	1.638	25	8.48	14.6	36.9	11603.5
	14	6.80794	2.2035	22.35	11.55	10.55	40.3	17197.5
	15	10.9532	1.673	21.3	8.65	14.5	30.45	14398
	28	6.01312	2.009	23.4	9.35	10.46	28.85	13417.5
	29	5.71253	2.1205	23	12.7	12.2	38.2	22859
	3	3.39993	0.4305	22.8	12.2	6.53	14.7	1113
	6	4.99359	0.349	24.75	13	4.52	9.79	724
	9	5.86802	0.468	22.55	11.65	8.94	18.35	2545
	12	3.78864	1.5935	23.5	11.65	26.1	26.85	7537.5
d365	13	4.42373	0.2165	24.05	10.21	2.47	19.3	1549.5
	14	4.70075	1.4075	22	8.81	13.4	30.6	4754
	15	5.40968	0.344	21.3	6.08	6	22.5	4598
	21	5.51986	0.079	23.9	11.2	7.06	16.8	3393.5
	28	5.25399	0.149	18.9	5.2	4.45	15.35	1034.5
	29	7.64374	1.019	21.4	10.3	14.35	31.25	8014

## Sheet: Avidity African population
Avidity Index African population
Kenya		Burkina Faso
4.16475		Nouna 1	6.27015
5.69486		Nouna 2	6.37996
6.23027		Nouna 3	4.32054
6.01458		Nouna 5	3.93241
6.06951		Nouna 6	4.09542
6		Nouna 7	4.47454
6.42483		Nouna 8	3.38089
7.88615		Nouna 9	3.47791
7.3984		Nouna 10	3.90686
7.80761
7.51324
5.1213			Avidity (M)	IgG3		Spearman r
5.03693		Nouna 1	6.27015	840.475		r	-0.7857
		Nouna 2	6.37996	5570.75		95% confidence interval
		Nouna 3	4.32054	6578.83
		Nouna 5	3.93241	8204.5		P value
		Nouna 6	4.09542	34451.2		P (two-tailed)	0.0279
		Nouna 7	4.47454	1627.6		P value summary	*
		Nouna 8	3.38089	33851.2		Exact or approximate P value?	Exact
		Nouna 9	3.47791	9411.5		Significant? (alpha = 0.05)	Yes
						Number of XY Pairs	8

## Sheet: Avidity subclasses
Avidity Index IgG subclasses								Fold change in avidity index
IgG1
Vaccinees	d0	d85	d182	d210	d365			Fc 85-0	Fc 182-85	Fc 210-182	Fc 365-210
28	0.61207	2.3541	2.29858	3.75003	3.2939			1	0.976415	1.59298	1.39922
12	1.18339	1.7437	1.02675	1.67747	1.6526			1	0.588832	0.96202	0.947755
21	0.731872	2.30162	1.84636	2.69999	1.91565			1	0.802201	1.17308	0.832306
29	0.997646	1.1323	1.38966	2.2962	2.21592			1	1.22729	2.02791	1.95701
IgG2
Vaccinees	d0	d85	d182	d210	d365			Fc 85-0	Fc 182-85	Fc 210-182	Fc 365-210
28	0.642855	2.29858	1.69175	2.85296	2.56191			1	0.735999	1.24119	1.11456
12	0.642855	0.502796	0.488711	0.56018	0.544556			1	0.971987	1.11413	1.08306
21	1.04769	2.85904	2.2661	3.27015	1.77923			1	0.792609	1.14379	0.622319
29	2.65104	2.34356	1.75384	2.3209	2.16264			1	0.748366	0.99033	0.922799
IgG3
Vaccinees	d0	d85	d182	d210	d365			Fc 85-0	Fc 182-85	Fc 210-182	Fc 365-210
28	1.87513	1.68686	1.54038	0.98045	0.853548			1	0.913163	0.581226	0.505997
12	0	0.80527	0.655385	0.744081	0.604829			1	0.813871	0.924014	0.751089
21	0	2.22775	1.72504	1.97586	1.0847			1	0.774345	0.886931	0.486905
29	0.468999	0.850905	0.625	0.796495	0.634003			1	0.734513	0.936057	0.745093
IgG4
Vaccinees	d0	d85	d182	d210	d365			Fc 85-0	Fc 182-85	Fc 210-182	Fc 365-210
28	0	1.58375	1.35697	2.49638	2.29167			1	0.856806	1.57625	1.44699
12	0	0.829683	1.62441	2.11966	1.84701			1	1.95787	2.55478	2.22617
21	0	1.14687	1.62441	1.9525	1.56455			1	1.41639	1.70246	1.36419
29	0.569853	1.15108	1.97578	2.22592	2.33571			1	1.71645	1.93376	2.02914
