# Supplementary material for: IgG Subclass Switch in Volunteers Repeatedly Immunized with the Full-Length Plasmodium falciparum Merozoite Surface Protein 1 (MSP1)
Source: Vaccines (Basel). 2024 Feb 17;12(2):208. doi: 10.3390/vaccines12020208 (PMC10893298; doi:10.3390/vaccines12020208)
Supplement: Supplementary file 1 [file vaccines-12-00208-s001.zip › Rathay et al. Supp. Data S5 .xlsx]

## Sheet: RT-qPCR 
Expr. Ratio
	IL-4						IL-10
Timepoints	14	28	29		Timepoints	14	28	29
d0	0.529009	0.602598	0.600421		d0	2.03052	0.459151	0.874141
d85	3.21866	0.228527	0.640856		d85	8.09278	0.198059	0.265069
d182	5.94784	2.49759	0.396063		d182	17.0333	0.824993	0.106678
d210	5.36258	6.46614	0.430852		d210	1.9437	1.81962	0.142742

## Sheet: ICS
Intracellular staining IL-4
Target cell	% IL-4+ at day 85				% IL-4+ at day 182				% IL-4+ at day 210
all CD3+	1.06077	1.31343	0.802752		1.49724	0.855721	1.82569		0.718232	0.830846	0.426606
CD4+	1.05917	1.31897	0.731076		1.79882	0.784483	1.50996		0.756053	0.755747	0.324701
CD8+	1.06289	1.27692	0.688034		1.77358	1.23077	0.726496		0.786164	0.930769	0.495727

## Sheet: IL-4 ELISA
IL-4 ELISA
		ODs-450nm
Vaccinees		Unstim	MSP1 stim	mean pg/mL MSP1
	d0	0.057	0.072	174.338
	d0	0.039	0.05
	d85	0.048	0.11	325.812
14	d85	0.051	0.118
	d182	0.05	0.134	354.392
	d182	0.08	0.114
	d210	0.054	0.101	288.658
	d210	0.054	0.101
		Unstim	MSP1 stim	mean pg/mL MSP1
	d0	0.044	0.046	226.977
	d0	0.056	0.045
	d85	0.045	0.048	244.436
28	d85	0.044	0.05
	d182	0.045	0.054	274.368
	d182	0.053	0.056
	d210	0.052	0.064	351.689
	d210	0.045	0.077
		Unstim	MSP1 stim	mean pg/mL MSP1
	d0	0.045	0.044	231.04
	d0	0.045	0.048
	d85	0.051	0.051	266.198
29	d85	0.049	0.055
	d182	0.067	0.064	323.958
	d182	0.05	0.065
	d210	0.047	0.055	276.243
	d210	0.047	0.055
