# Supplementary material for: IgG Subclass Switch in Volunteers Repeatedly Immunized with the Full-Length Plasmodium falciparum Merozoite Surface Protein 1 (MSP1)
Source: Vaccines (Basel). 2024 Feb 17;12(2):208. doi: 10.3390/vaccines12020208 (PMC10893298; doi:10.3390/vaccines12020208)
Supplement: Supplementary file 1 [file vaccines-12-00208-s001.zip › Rathay et al. Supp. Data S6.xlsx]

## Sheet: 4 immunizat. doses comparisson
IgG1		25ug MSP1						50ug MSP1						150ug MSP1
0	0.112	0.0895	0.188		0.082	0.16	0.08	0.175	0.43	0.21	0.09		0.276	0.123	0.2245
29	0.2265	0.351	0.7075		0.273	1.241	0.6805	0.6695	0.3855	1.1035	0.4435		0.9635	1.2755	1.52
57	1.379	1.429	1.5255		1.457	1.5805	1.4255	1.422	1.497	1.4905	1.197		1.354	1.4155	1.5235
85	1.3295	1.363	1.5465		1.441	1.578	1.417	1.401	1.4735	1.481	1.242		1.4035	1.4035	1.4935
182	1.215	1.3255	1.525		1.482	1.451	1.41	1.389	1.478	1.37	1.23		1.409	1.408	1.462
210	1.3545	1.428	1.5125		1.434	1.5215	1.4585	1.432	1.4165	1.469	1.231		1.419	1.4305	1.559
365	1.29	1.203	1.4965		1.3425	1.3705	1.253	1.31	1.275	1.3765	1.1135		1.2825	1.4	1.398
Number of families	7
Number of comparisons per family	3
Alpha	0.05
Tukey's multiple comparisons test	Mean Diff,	95,00% CI of diff,	Below threshold?	Summary	Adjusted P Value
0
25ug MSP1 vs. 50ug MSP1	-0.04545	-0,3967 to 0,3058	No	ns	0.7577
25ug MSP1 vs. 150ug MSP1	-0.078	-0,3314 to 0,1754	No	ns	0.3565
50ug MSP1 vs. 150ug MSP1	-0.03255	-0,4562 to 0,3911	No	ns	0.8986
29
25ug MSP1 vs. 50ug MSP1	-0.2569	-1,731 to 1,217	No	ns	0.633
25ug MSP1 vs. 150ug MSP1	-0.8247	-1,146 to -0,5038	Yes	**	0.0079
50ug MSP1 vs. 150ug MSP1	-0.5678	-1,810 to 0,6740	No	ns	0.201
57
25ug MSP1 vs. 50ug MSP1	0.006	-0,4040 to 0,4160	No	ns	0.9959
25ug MSP1 vs. 150ug MSP1	0.0135	-0,02561 to 0,05261	No	ns	0.306
50ug MSP1 vs. 150ug MSP1	0.0075	-0,4239 to 0,4389	No	ns	0.9943
85
25ug MSP1 vs. 50ug MSP1	-0.02036	-0,5529 to 0,5122	No	ns	0.9728
25ug MSP1 vs. 150ug MSP1	-0.0205	-0,2444 to 0,2034	No	ns	0.8619
50ug MSP1 vs. 150ug MSP1	-0.0001429	-0,3950 to 0,3947	No	ns	>0,9999
182
25ug MSP1 vs. 50ug MSP1	-0.04626	-0,6248 to 0,5322	No	ns	0.8911
25ug MSP1 vs. 150ug MSP1	-0.07117	-0,5095 to 0,3671	No	ns	0.6653
50ug MSP1 vs. 150ug MSP1	-0.0249	-0,2733 to 0,2234	No	ns	0.8388
210
25ug MSP1 vs. 50ug MSP1	0.008452	-0,2805 to 0,2974	No	ns	0.9839
25ug MSP1 vs. 150ug MSP1	-0.03783	-0,1463 to 0,07064	No	ns	0.3016
50ug MSP1 vs. 150ug MSP1	-0.04629	-0,3711 to 0,2785	No	ns	0.7207
365
25ug MSP1 vs. 50ug MSP1	0.03826	-0,5806 to 0,6571	No	ns	0.9319
25ug MSP1 vs. 150ug MSP1	-0.03033	-0,5450 to 0,4844	No	ns	0.9377
50ug MSP1 vs. 150ug MSP1	-0.0686	-0,3828 to 0,2456	No	ns	0.524
Test details	Mean 1	Mean 2	Mean Diff,	SE of diff,	N1	N2
0
25ug MSP1 vs. 50ug MSP1	0.1298	0.1753	-0.04545	0.05963	3	7
25ug MSP1 vs. 150ug MSP1	0.1298	0.2078	-0.078	0.04301	3	3
50ug MSP1 vs. 150ug MSP1	0.1753	0.2078	-0.03255	0.07191	7	3
29
25ug MSP1 vs. 50ug MSP1	0.4283	0.6852	-0.2569	0.2502	3	7
25ug MSP1 vs. 150ug MSP1	0.4283	1.253	-0.8247	0.05447	3	3
50ug MSP1 vs. 150ug MSP1	0.6852	1.253	-0.5678	0.2108	7	3
57
25ug MSP1 vs. 50ug MSP1	1.445	1.439	0.006	0.06961	3	7
25ug MSP1 vs. 150ug MSP1	1.445	1.431	0.0135	0.00664	3	3
50ug MSP1 vs. 150ug MSP1	1.439	1.431	0.0075	0.07324	7	3
85
25ug MSP1 vs. 50ug MSP1	1.413	1.433	-0.02036	0.0904	3	7
25ug MSP1 vs. 150ug MSP1	1.413	1.434	-0.0205	0.038	3	3
50ug MSP1 vs. 150ug MSP1	1.433	1.434	-0.0001429	0.06704	7	3
182
25ug MSP1 vs. 50ug MSP1	1.355	1.401	-0.04626	0.0982	3	7
25ug MSP1 vs. 150ug MSP1	1.355	1.426	-0.07117	0.07441	3	3
50ug MSP1 vs. 150ug MSP1	1.401	1.426	-0.0249	0.04216	7	3
210
25ug MSP1 vs. 50ug MSP1	1.432	1.423	0.008452	0.04904	3	7
25ug MSP1 vs. 150ug MSP1	1.432	1.47	-0.03783	0.01841	3	3
50ug MSP1 vs. 150ug MSP1	1.423	1.47	-0.04629	0.05514	7	3
365
25ug MSP1 vs. 50ug MSP1	1.33	1.292	0.03826	0.1051	3	7
25ug MSP1 vs. 150ug MSP1	1.33	1.36	-0.03033	0.08738	3	3
50ug MSP1 vs. 150ug MSP1	1.292	1.36	-0.0686	0.05334	7	3
IgG2		25ug MSP1						50ug MSP1						150ug MSP1
0	0.0515	0.0515	0.052		0.08	0.079	0.08	0.066	0.1195	0.0945	0.043		0.068	0.0605	0.1045
29	0.06	0.0645	0.0915		0.0985	0.19	0.124	0.077	0.0865	0.1035	0.0455		0.097	0.122	0.2425
57	0.221	0.3795	0.354		0.2585	0.251	0.2255	0.507	0.439	0.2865	0.18		0.159	0.1955	0.499
85	0.316	0.287	0.3925		0.4565	0.5525	0.2505	1.1985	0.412	0.538	0.1565		0.171	0.2605	0.378
182	0.157	0.23	0.3205		0.296	0.311	0.2265	0.9695	0.2485	0.3065	0.163		0.225	0.1965	0.24
210	0.425	0.528	0.65		0.605	0.7465	0.4125	1.141	0.783	0.7105	0.289		0.3655	0.424	0.6995
365	0.2645	0.165	0.2945		0.259	0.3875	0.2155	0.8515	0.2225	0.2985	0.139		0.1225	0.213	0.224
Number of families	7
Number of comparisons per family	3
Alpha	0.05
Tukey's multiple comparisons test	Mean Diff,	95,00% CI of diff,	Below threshold?	Summary	Adjusted P Value
Row 1
25ug MSP1 vs. 50ug MSP1	-0.01739	-0,04098 to 0,006203	No	ns	0.1583
25ug MSP1 vs. 150ug MSP1	-0.01713	-0,05827 to 0,02402	No	ns	0.3652
50ug MSP1 vs. 150ug MSP1	0.0002639	-0,03887 to 0,03940	No	ns	0.9998
Row 2
25ug MSP1 vs. 50ug MSP1	-0.03042	-0,07322 to 0,01238	No	ns	0.1778
25ug MSP1 vs. 150ug MSP1	-0.07108	-0,2126 to 0,07041	No	ns	0.2477
50ug MSP1 vs. 150ug MSP1	-0.04065	-0,1733 to 0,09202	No	ns	0.5715
Row 3
25ug MSP1 vs. 50ug MSP1	-0.0642	-0,2508 to 0,1224	No	ns	0.6051
25ug MSP1 vs. 150ug MSP1	-0.04233	-0,3331 to 0,2485	No	ns	0.8944
50ug MSP1 vs. 150ug MSP1	0.02188	-0,2654 to 0,3091	No	ns	0.9642
Row 4
25ug MSP1 vs. 50ug MSP1	-0.185	-0,4779 to 0,1080	No	ns	0.2394
25ug MSP1 vs. 150ug MSP1	-0.0769	-0,4791 to 0,3253	No	ns	0.7698
50ug MSP1 vs. 150ug MSP1	0.1081	-0,2965 to 0,5126	No	ns	0.7403
Row 5
25ug MSP1 vs. 50ug MSP1	-0.1489	-0,3898 to 0,09193	No	ns	0.2603
25ug MSP1 vs. 150ug MSP1	-0.04883	-0,2345 to 0,1368	No	ns	0.7218
50ug MSP1 vs. 150ug MSP1	0.1001	-0,1489 to 0,3491	No	ns	0.5417
Row 6
25ug MSP1 vs. 50ug MSP1	-0.1145	-0,4112 to 0,1822	No	ns	0.5685
25ug MSP1 vs. 150ug MSP1	0.02293	-0,2891 to 0,3350	No	ns	0.9744
50ug MSP1 vs. 150ug MSP1	0.1374	-0,1675 to 0,4423	No	ns	0.455
Row 7
25ug MSP1 vs. 50ug MSP1	-0.09774	-0,3814 to 0,1859	No	ns	0.6017
25ug MSP1 vs. 150ug MSP1	0.05483	-0,1289 to 0,2385	No	ns	0.5736
50ug MSP1 vs. 150ug MSP1	0.1526	-0,1270 to 0,4321	No	ns	0.3077
Test details	Mean 1	Mean 2	Mean Diff,	SE of diff,	N1	N2	q
Row 1
25ug MSP1 vs. 50ug MSP1	0.0565	0.07389	-0.01739	0.008636	5	9	2.848
25ug MSP1 vs. 150ug MSP1	0.0565	0.07363	-0.01713	0.0109	5	4	2.221
50ug MSP1 vs. 150ug MSP1	0.07389	0.07363	0.0002639	0.01316	9	4	0.02837
Row 2
25ug MSP1 vs. 50ug MSP1	0.0688	0.09922	-0.03042	0.01576	5	9	2.73
25ug MSP1 vs. 150ug MSP1	0.0688	0.1399	-0.07108	0.03527	5	4	2.85
50ug MSP1 vs. 150ug MSP1	0.09922	0.1399	-0.04065	0.03757	9	4	1.53
Row 3
25ug MSP1 vs. 50ug MSP1	0.2433	0.3075	-0.0642	0.06504	5	9	1.396
25ug MSP1 vs. 150ug MSP1	0.2433	0.2856	-0.04233	0.09311	5	4	0.6428
50ug MSP1 vs. 150ug MSP1	0.3075	0.2856	0.02188	0.08471	9	4	0.3652
Row 4
25ug MSP1 vs. 50ug MSP1	0.2861	0.4711	-0.185	0.1061	5	9	2.465
25ug MSP1 vs. 150ug MSP1	0.2861	0.363	-0.0769	0.1076	5	4	1.011
50ug MSP1 vs. 150ug MSP1	0.4711	0.363	0.1081	0.1437	9	4	1.064
Row 5
25ug MSP1 vs. 50ug MSP1	0.2173	0.3662	-0.1489	0.08942	5	9	2.355
25ug MSP1 vs. 150ug MSP1	0.2173	0.2661	-0.04883	0.06187	5	4	1.116
50ug MSP1 vs. 150ug MSP1	0.3662	0.2661	0.1001	0.09217	9	4	1.536
Row 6
25ug MSP1 vs. 50ug MSP1	0.5348	0.6493	-0.1145	0.1101	5	9	1.47
25ug MSP1 vs. 150ug MSP1	0.5348	0.5119	0.02293	0.1054	5	4	0.3075
50ug MSP1 vs. 150ug MSP1	0.6493	0.5119	0.1374	0.11	9	4	1.767
Row 7
25ug MSP1 vs. 50ug MSP1	0.2413	0.3391	-0.09774	0.09834	3	7	1.406
25ug MSP1 vs. 150ug MSP1	0.2413	0.1865	0.05483	0.05065	3	3	1.531
50ug MSP1 vs. 150ug MSP1	0.3391	0.1865	0.1526	0.09578	7	3	2.253
IgG3		25ug MSP1						50ug MSP1						150ug MSP1
0	0.134	0.082	0.418		0.1825	0.1885	0.1395	0.1355	0.131	0.1195	0.079		0.0955	0.1125	0.15
29	0.2445	0.2685	1.231		0.286	0.684	0.529	0.5685	0.182	0.679	0.5095		0.551	1.136	1.345
57	1.322	1.3165	1.484		1.137	1.1425	1.5005	1.376	1.4785	1.326	1.0245		1.009	1.2595	1.485
85	1.238	1.123	1.4475		1.102	0.986	1.4665	1.469	1.285	1.4515	1.0315		0.984	1.163	1.4245
182	0.495	0.3985	1.2975		0.5505	0.5115	0.916	1.243	0.772	0.742	0.594		0.7025	0.825	0.832
210	0.9665	0.9005	1.3315		1.0325	0.839	1.2015	1.399	1.218	1.269	0.8535		1.1315	1.082	1.3245
365	0.4525	0.2535	1.089		0.3395	0.2115	0.29	1.0205	0.364	0.4635	0.3465		0.28	0.676	0.479
Within each row, compare columns (simple effects within rows)
Number of families	7
Number of comparisons per family	3
Alpha	0.05
Tukey's multiple comparisons test	Mean Diff,	95,00% CI of diff,	Below threshold?	Summary	Adjusted P Value
Row 1
25ug MSP1 vs. 50ug MSP1	0.4341	-0,3702 to 1,238	No	ns	0.2474
25ug MSP1 vs. 150ug MSP1	0.4372	-0,3674 to 1,242	No	ns	0.2439
50ug MSP1 vs. 150ug MSP1	0.003097	-0,04742 to 0,05362	No	ns	0.9844
Row 2
25ug MSP1 vs. 50ug MSP1	0.41	-0,5719 to 1,392	No	ns	0.4204
25ug MSP1 vs. 150ug MSP1	-0.03408	-1,036 to 0,9683	No	ns	0.9942
50ug MSP1 vs. 150ug MSP1	-0.4441	-1,088 to 0,1999	No	ns	0.1523
Row 3
25ug MSP1 vs. 50ug MSP1	0.185	-0,1169 to 0,4869	No	ns	0.2507
25ug MSP1 vs. 150ug MSP1	0.1943	-0,2410 to 0,6295	No	ns	0.4111
50ug MSP1 vs. 150ug MSP1	0.00925	-0,4117 to 0,4302	No	ns	0.9972
Row 4
25ug MSP1 vs. 50ug MSP1	0.1509	-0,2204 to 0,5223	No	ns	0.5004
25ug MSP1 vs. 150ug MSP1	0.1356	-0,3629 to 0,6342	No	ns	0.7045
50ug MSP1 vs. 150ug MSP1	-0.01532	-0,4857 to 0,4551	No	ns	0.9938
Row 5
25ug MSP1 vs. 50ug MSP1	0.2049	-0,6291 to 1,039	No	ns	0.7243
25ug MSP1 vs. 150ug MSP1	0.2955	-0,5498 to 1,141	No	ns	0.5195
50ug MSP1 vs. 150ug MSP1	0.09054	-0,2173 to 0,3984	No	ns	0.7123
Row 6
25ug MSP1 vs. 50ug MSP1	0.1503	-0,3973 to 0,6980	No	ns	0.6815
25ug MSP1 vs. 150ug MSP1	0.196	-0,3733 to 0,7653	No	ns	0.5825
50ug MSP1 vs. 150ug MSP1	0.04568	-0,3334 to 0,4248	No	ns	0.9274
Row 7
25ug MSP1 vs. 50ug MSP1	0.1647	-1,063 to 1,392	No	ns	0.8284
25ug MSP1 vs. 150ug MSP1	0.12	-1,095 to 1,335	No	ns	0.9049
50ug MSP1 vs. 150ug MSP1	-0.04469	-0,5324 to 0,4431	No	ns	0.9546
Test details	Mean 1	Mean 2	Mean Diff,	SE of diff,	N1	N2	q	DF
Row 1
25ug MSP1 vs. 50ug MSP1	0.5608	0.1267	0.4341	0.2264	5	9	2.711	4.029
25ug MSP1 vs. 150ug MSP1	0.5608	0.1236	0.4372	0.2263	5	4	2.731	4.023
50ug MSP1 vs. 150ug MSP1	0.1267	0.1236	0.003097	0.01831	9	4	0.2392	9.618
Row 2
25ug MSP1 vs. 50ug MSP1	0.9408	0.5308	0.41	0.2975	5	9	1.949	4.809
25ug MSP1 vs. 150ug MSP1	0.9408	0.9749	-0.03408	0.3317	5	4	0.1453	6.335
50ug MSP1 vs. 150ug MSP1	0.5308	0.9749	-0.4441	0.1936	9	4	3.243	4.713
Row 3
25ug MSP1 vs. 50ug MSP1	1.503	1.318	0.185	0.1073	5	9	2.439	8.624
25ug MSP1 vs. 150ug MSP1	1.503	1.309	0.1943	0.1414	5	4	1.943	5.932
50ug MSP1 vs. 150ug MSP1	1.318	1.309	0.00925	0.1305	9	4	0.1002	5.13
Row 4
25ug MSP1 vs. 50ug MSP1	1.414	1.263	0.1509	0.1284	5	9	1.663	7.563
25ug MSP1 vs. 150ug MSP1	1.414	1.278	0.1356	0.1654	5	4	1.16	6.39
50ug MSP1 vs. 150ug MSP1	1.263	1.278	-0.01532	0.1447	9	4	0.1497	5.013
Row 5
25ug MSP1 vs. 50ug MSP1	1.022	0.8172	0.2049	0.2594	5	9	1.117	5.173
25ug MSP1 vs. 150ug MSP1	1.022	0.7266	0.2955	0.2517	5	4	1.66	4.595
50ug MSP1 vs. 150ug MSP1	0.8172	0.7266	0.09054	0.1135	9	4	1.128	10.7
Row 6
25ug MSP1 vs. 50ug MSP1	1.288	1.138	0.1503	0.1739	5	9	1.223	5.506
25ug MSP1 vs. 150ug MSP1	1.288	1.092	0.196	0.1896	5	4	1.462	6.484
50ug MSP1 vs. 150ug MSP1	1.138	1.092	0.04568	0.1227	9	4	0.5264	5.866
Row 7
25ug MSP1 vs. 50ug MSP1	0.5983	0.4336	0.1647	0.2718	3	7	0.8569	2.685
25ug MSP1 vs. 150ug MSP1	0.5983	0.4783	0.12	0.2767	3	3	0.6133	2.79
50ug MSP1 vs. 150ug MSP1	0.4336	0.4783	-0.04469	0.1532	7	3	0.4126	5.324
IgG4		25ug MSP1						50ug MSP1						150ug MSP1
0	0.056	0.052	0.0995		0.0485	0.059	0.068	0.054	0.0625	0.0735	0.0535		0.0655	0.057	0.0645
29	0.063	0.063	0.0665		0.0505	0.058	0.0695	0.0585	0.061	0.081	0.043		0.072	0.0735	0.094
57	0.2275	0.133	0.265		0.11	0.1355	0.126	0.09	0.2165	0.131	0.1		0.0805	0.1165	0.3085
85	0.274	0.1505	0.3105		0.1895	0.2115	0.1555	0.185	0.211	0.322	0.192		0.0955	0.312	0.311
182	1.012	0.521	0.598		0.122	0.2955	0.4355	0.2095	0.274	0.944	0.153		0.185	0.905	0.8565
210	1.3185	1.116	1.367		0.65	0.743	1.1725	1.021	1.0885	1.2625	0.346		0.597	1.1705	1.462
365	1.324	0.777	1.2085		0.3855	0.326	0.693	0.826	0.51	1.065	0.2115		0.32	1.046	1.053
Within each row, compare columns (simple effects within rows)
Number of families	7
Number of comparisons per family	3
Alpha	0.05
Tukey's multiple comparisons test	Mean Diff,	95,00% CI of diff,	Below threshold?	Summary	Adjusted P Value
Row 1
25ug MSP1 vs. 50ug MSP1	0.007694	-0,03684 to 0,05223	No	ns	0.7945
25ug MSP1 vs. 150ug MSP1	0.003917	-0,04092 to 0,04875	No	ns	0.9388
50ug MSP1 vs. 150ug MSP1	-0.003778	-0,01537 to 0,007810	No	ns	0.6212
Row 2
25ug MSP1 vs. 50ug MSP1	0.003911	-0,007322 to 0,01514	No	ns	0.6296
25ug MSP1 vs. 150ug MSP1	-0.0112	-0,04199 to 0,01959	No	ns	0.4303
50ug MSP1 vs. 150ug MSP1	-0.01511	-0,04415 to 0,01392	No	ns	0.2796
Row 3
25ug MSP1 vs. 50ug MSP1	0.02317	-0,1122 to 0,1586	No	ns	0.8459
25ug MSP1 vs. 150ug MSP1	0.0115	-0,2019 to 0,2249	No	ns	0.9845
50ug MSP1 vs. 150ug MSP1	-0.01167	-0,2367 to 0,2134	No	ns	0.9777
Row 4
25ug MSP1 vs. 50ug MSP1	-0.01562	-0,1404 to 0,1091	No	ns	0.9351
25ug MSP1 vs. 150ug MSP1	-0.0629	-0,2891 to 0,1633	No	ns	0.6594
50ug MSP1 vs. 150ug MSP1	-0.04728	-0,2738 to 0,1792	No	ns	0.7668
Row 5
25ug MSP1 vs. 50ug MSP1	0.07039	-0,4700 to 0,6107	No	ns	0.9309
25ug MSP1 vs. 150ug MSP1	-0.1446	-0,8081 to 0,5188	No	ns	0.798
50ug MSP1 vs. 150ug MSP1	-0.215	-0,8313 to 0,4012	No	ns	0.5776
Row 6
25ug MSP1 vs. 50ug MSP1	0.3076	-0,001900 to 0,6172	No	ns	0.0514
25ug MSP1 vs. 150ug MSP1	0.2885	-0,5780 to 1,155	No	ns	0.4703
50ug MSP1 vs. 150ug MSP1	-0.01919	-0,8241 to 0,7857	No	ns	0.9964
Row 7
25ug MSP1 vs. 50ug MSP1	0.6288	0,04700 to 1,211	Yes	*	0.0368
25ug MSP1 vs. 150ug MSP1	0.2656	-0,5739 to 1,105	No	ns	0.6054
50ug MSP1 vs. 150ug MSP1	-0.3631	-1,175 to 0,4483	No	ns	0.3759
Test details	Mean 1	Mean 2	Mean Diff,	SE of diff,	N1	N2	q	DF
Row 1
25ug MSP1 vs. 50ug MSP1	0.06625	0.05856	0.007694	0.01151	4	9	0.9458	3.403
25ug MSP1 vs. 150ug MSP1	0.06625	0.06233	0.003917	0.01146	4	3	0.4832	3.341
50ug MSP1 vs. 150ug MSP1	0.05856	0.06233	-0.003778	0.003921	9	3	1.362	6.904
Row 2
25ug MSP1 vs. 50ug MSP1	0.0628	0.05889	0.003911	0.004179	5	9	1.324	11.36
25ug MSP1 vs. 150ug MSP1	0.0628	0.074	-0.0112	0.007942	5	4	1.994	3.394
50ug MSP1 vs. 150ug MSP1	0.05889	0.074	-0.01511	0.008533	9	4	2.505	4.448
Row 3
25ug MSP1 vs. 50ug MSP1	0.155	0.1318	0.02317	0.04131	5	9	0.7931	4.901
25ug MSP1 vs. 150ug MSP1	0.155	0.1435	0.0115	0.06831	5	4	0.2381	5.649
50ug MSP1 vs. 150ug MSP1	0.1318	0.1435	-0.01167	0.05743	9	4	0.2873	3.33
Row 4
25ug MSP1 vs. 50ug MSP1	0.2081	0.2237	-0.01562	0.04461	5	9	0.4953	8.914
25ug MSP1 vs. 150ug MSP1	0.2081	0.271	-0.0629	0.06928	5	4	1.284	4.952
50ug MSP1 vs. 150ug MSP1	0.2237	0.271	-0.04728	0.06602	9	4	1.013	4.36
Row 5
25ug MSP1 vs. 50ug MSP1	0.5105	0.4401	0.07039	0.1946	5	9	0.5116	9.274
25ug MSP1 vs. 150ug MSP1	0.5105	0.6551	-0.1446	0.2221	5	4	0.9209	6.615
50ug MSP1 vs. 150ug MSP1	0.4401	0.6551	-0.215	0.2064	9	4	1.473	6.626
Row 6
25ug MSP1 vs. 50ug MSP1	1.249	0.9416	0.3076	0.1137	5	9	3.827	10.43
25ug MSP1 vs. 150ug MSP1	1.249	0.9608	0.2885	0.2182	5	4	1.869	3.257
50ug MSP1 vs. 150ug MSP1	0.9416	0.9608	-0.01919	0.238	9	4	0.114	4.517
Row 7
25ug MSP1 vs. 50ug MSP1	1.203	0.5739	0.6288	0.192	4	7	4.631	6.275
25ug MSP1 vs. 150ug MSP1	1.203	0.937	0.2656	0.2653	4	4	1.416	5.426
50ug MSP1 vs. 150ug MSP1	0.5739	0.937	-0.3631	0.2445	7	4	2.101	4.738

## Sheet: 3  immunizations only
d0-d250								d0-d365
IgG1	vaccinee	d0	d29	d57	d85	d250		IgG1	vaccinee	d0	d29	d57	d85	d365
	7	0.087	0.5965	1.7335	1.797	1.776		19		0.384	1.6895	1.854	1.793	1.4565
	11	0.081	1.531	1.84	1.831	1.2685		24		0.0955	0.7625	1.802	1.808	1.618
								27		0.089	0.833	1.718	1.7545	1.518
IgG2	vaccinee	d0	d29	d57	d85	d250		IgG2	vaccinee	d0	d29	d57	d85	d365
	7	0.0585	0.0615	0.423	0.493	0.676		19		0.0645	0.1575	0.409	0.4855	0.24
	11	0.0715	0.074	0.3195	0.2195	0.1855		24		0.051	0.0585	0.142	0.2635	0.0835
								27		0.0545	0.063	0.1845	0.3045	0.0975
IgG3	vaccinee	d0	d29	d57	d85	d250		IgG3	vaccinee	d0	d29	d57	d85	d365
	7	0.0975	0.5365	1.6405	1.5615	1.2985		19		0.1625	1.6865	1.7185	1.561	0.442
	11	0.125	1.141	1.573	1.103	0.3065		24		0.113	0.6185	1.3145	1.409	0.2865
								27		0.192	0.877	1.628	1.674	0.7205
IgG4	vaccinee	d0	d29	d57	d85	d250		IgG4	vaccinee	d0	d29	d57	d85	d365
	7	0.0745	0.0615	0.1995	0.3605	1.3375		19		0.0575	0.3395	0.452	0.556	1.273
	11	0.0635	0.0655	0.128	0.3095	1.0065		24		0.051	0.0525	0.0845	0.158	0.2195
								27		0.057	0.0575	0.122	0.117	0.0835
